# Supplementary material
Source: ML conference proceedings conference paper supplement (https://openaccess.thecvf.com/content/WACV2025/html/Khan_Compositional_Segmentation_of_WACV_2025_paper.html)
Supplement: Supplementary file 1 [file Khan_Compositional_Segmentation_of_WACV_2025_supplemental.pdf]

## Supplementary Material

### Compositional Segmentation of Cardiac Images Leveraging Metadata

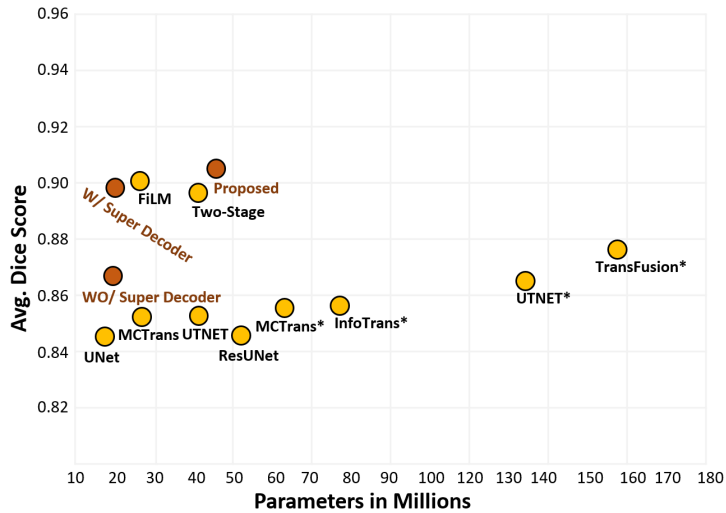

Figure 1. Model Size vs Average Dice score comparison of the proposed compositional and CMFI Module approach against different methods using a five-fold cross-validation split on M&Ms-2 dataset.
